# DNA Binding and Dimerization Determinants for Thyroid Hormone Receptor $\alpha$ and Its Interaction with a Nuclear Protein

Xiao-kun Zhang\*, Paul Bui-Vinh Tran, and Magnus Pfahl

Cancer Center  
La Jolla Cancer Research Foundation  
La Jolla, California 92037

The gel retardation assay was used to analyze the role of the thyroid hormone receptor  $\alpha$  (TR $\alpha$ ) ligand-binding domain (LBD) in controlling receptor interaction with a thyroid hormone responsive element (TRE). While wild type receptor TR $\alpha$  binds to the TRE mainly as monomer, deletion of 85 amino acids from its C-terminus results in a mutant receptor with enhanced DNA binding that forms several slow mobility complexes as revealed by gel retardation assay. Receptor deletion mutants that lack most of the LBD show significantly elevated DNA binding and are still able to bind to DNA as two complexes. Thus, the C-terminal end of TR $\alpha$  appears to interfere with the dimerization/oligomerization function and DNA binding of TR $\alpha$ . All C-terminal deletion mutants have lost their T<sub>3</sub>-responsive activator function, but some show constitutive activity. Nuclear factor from several cell lines, including CV-1, F9, and GC cells, interacts with TR $\alpha$  receptor to form a larger molecular weight complex as determined by gel retardation assay. This factor could not be detected in HeLat<sup>k</sup> cells, where TR $\alpha$  does not activate a TRE-containing reporter gene. The nuclear factor is heat sensitive and does not bind to TRE itself but can interact with TR $\alpha$  in the absence of DNA. Deletion analysis demonstrates that the leucine zipper-like sequence located in the LBD of TR $\alpha$  is involved in this interaction. Together, our data suggest that TR $\alpha$  contains a dimerization function outside the LBD which is inhibited by the carboxy-terminal region, while the leucine zipper-like sequence in the LBD is required for interaction with a nuclear factor. (*Molecular Endocrinology* 5: 1909–1920, 1991)

## INTRODUCTION

The thyroid hormone T<sub>3</sub> regulates cellular growth, development, and metabolism predominantly through

binding to specific nuclear receptors that modulate the transcription of responsive genes. These thyroid hormone receptors (TRs) belong to a large family of ligand-activated nuclear transcription factors that includes the steroid hormone, retinoic acid, and vitamin D<sub>3</sub> receptors (1–4). The members of this superfamily have a highly conserved DNA binding domain and a less conserved carboxy-terminal ligand binding domain (LBD) (reviewed in Refs. 5, 6). According to the DNA recognition sequences, the superfamily can be divided into subfamilies: the glucocorticoid (GR), progesterone (PR), mineralocorticoid, and androgen receptors bind to a similar DNA binding site (reviewed in 7), while the estrogen receptor (ER) and retinoic acid receptor (RAR) are able to interact functionally with T<sub>3</sub>-responsive elements (TREs) (8–10). The thyroid hormone receptors are encoded by two separate genes,  $\alpha$  and  $\beta$  (2, 11), both of which give rise to multiple receptor subtypes through alternative splicing events (3, 12–17). Binding of TR $\alpha$  and TR $\beta$  to TREs occurs in the absence of ligand (9, 18–19). This is of functional significance since, in the absence of T<sub>3</sub>, TR $\alpha$  and TR $\beta$  are able to repress the activity of RAR (9, 20) and ER (10) from a common response element, presumably due to their high affinity for the response element. Thus, in the presence of T<sub>3</sub>, TRs are transcriptional activators of responsive genes, while in the absence of T<sub>3</sub>, they can function as negative regulators or transcriptional silencers (19, 21). The DNA binding activity of TRs is therefore likely to be essential for the bifunctional roles of TRs.

Recent results indicate that the DNA binding activity of several nuclear receptors including ER, RAR, and TR is not solely determined by their DNA binding domain but can be largely influenced by their LBD (19, 22). This region encompasses the carboxyl terminal half of the receptor and is responsible for multiple functions of the receptors, as shown by mutant and variant analyses. The v-erbA protein, that contains a nine-amino acid deletion and several amino acid exchanges in the LBD lacks ligand binding and *trans*-activation activity but has maintained repressor and DNA binding functions (18, 23, 24). The TR $\alpha$  isoforms that contain an altered carboxy-terminus as a result of alternative

splicing events also lack ligand binding (13, 25) but in addition show largely reduced DNA binding activity (26). A mutation in the LBD of TR $\beta$  causes thyroid hormone resistance syndrome (27), while a deletion analysis of TR $\beta$  showed that the ligand binding/carboxy-terminal region is also involved in receptor oligomerization and modulates DNA binding (19). Here we report that although TR $\alpha$  contains a dimerization function outside the LBD and a second dimerization/oligomerization domain is present in the LBD, the LBD represses DNA binding and dimerization/oligomerization functions in the full-length receptor. In addition, we report that the LBD of TR $\alpha$  mediates the interaction of TR $\alpha$  with a cell type-specific nuclear protein that enhances DNA binding and may be essential for transcriptional activation.

## RESULTS

### Complex Role of the TR $\alpha$ Ligand Binding Domain in Controlling DNA Binding

To study DNA binding of TR $\alpha$  and how it is affected by its ligand binding domain, a number of TR $\alpha$  mutants were generated by sequential deletion of its C-terminal end (Fig. 1A). The gel retardation assay (9, 19) was used to compare the binding of equal amounts of *in vitro* translated TR $\alpha$  and TR $\alpha$  mutant proteins to a palindromic TRE (28). Figure 1B shows the binding pattern of mutant and wild type receptor proteins. TR $\alpha$  forms one major complex with the TRE under the conditions used, while a second, slower migrating complex (that overlaps with the nonspecific band) is seen at elevated TR $\alpha$  concentration (data not shown). Deletion of 8 amino acids from its C-terminus does not change the binding pattern of this receptor ( $\Delta$ TR1). However, a deletion of additional 85 amino acids results in a mutant ( $\Delta$ TR2) which binds to the TRE with enhanced intensity and forms additional complexes. These complexes migrated more slowly than the complex formed by wild type TR $\alpha$ , suggesting that this mutant may more efficiently dimerize and oligomerize. Deletion of 112 additional amino acids from the C-terminus of  $\Delta$ TR2 significantly increased DNA binding of this mutant ( $\Delta$ TR3). Although deleted for most of the ligand binding domain, the  $\Delta$ TR3 protein still forms two major complexes with the TRE which are more prominent than the complexes formed by wild type TR $\alpha$  and the other mutants.  $\Delta$ TR4, which lacks the entire LBD and most of the hinge region, also retains the ability to bind DNA and forms two complexes. However, a mutant, deleted up to amino acid 120 ( $\Delta$ TR5), that lacks one amino acid from the DNA-binding domain, has lost all measurable DNA binding activity (Fig. 1B).

To demonstrate the specificity of the binding of these proteins to the TRE, an antigenic coding sequence (Flag) (29) was added to their 5'-ends. This Flag sequence, when connected to TRs, is recognized by a specific anti-Flag monoclonal antibody (26). When TR $\alpha$  and  $\Delta$ TR3 were incubated with anti-Flag antibody and

DNA, the protein-DNA complexes were upshifted to a slower migrating position, indicating that the complexes observed contained indeed the mutated proteins (Fig. 1C). Similar results were obtained with  $\Delta$ TR3 and  $\Delta$ TR4. The DNA binding activity of TR $\alpha$  and the mutants was not significantly affected by the presence of T<sub>3</sub>. Thus this study strongly suggests that the TR $\alpha$  LBD influences (positively or negatively) DNA binding and oligomerization activity of the receptor.

The efficient oligomerization of the TR $\alpha$ 2 mutant also could be demonstrated with a TRE dimer (Fig. 2A). In this case, wild type TR $\alpha$  formed three major complexes with the TRE dimer, which were not affected by the addition of T<sub>3</sub>.  $\Delta$ TR1 and  $\Delta$ TR3 showed a similar binding pattern.  $\Delta$ TR3 binds to DNA with highest intensity. In addition, it formed four major complexes, of which the highest molecular weight complex migrated at the same position as the highest molecular weight complex formed by TR $\alpha$ , although  $\Delta$ TR3 is much smaller than TR $\alpha$ . This suggests that  $\Delta$ TR3 can dimerize or oligomerize more efficiently than TR $\alpha$ . More surprisingly, when  $\Delta$ TR2 was analyzed, it formed at least five complexes with the TRE dimer, three of which migrated much more slowly than the largest TR $\alpha$  complex (although this mutant protein is smaller than TR $\alpha$ ). Thus,  $\Delta$ TR2 displays a clearly enhanced dimerization and oligomerization activity. Taken together, these data suggest to us that the C-terminal region of TR $\alpha$  interferes with the dimerization function of TR $\alpha$ .

To determine whether such a highly dimerizing protein could efficiently interact with other receptors,  $\Delta$ TR2 protein was mixed with TR $\alpha$ , or both proteins were cotranslated. In neither case could  $\Delta$ TR2 dimerize with TR $\alpha$  to form a new complex (Fig. 2B). When TR $\alpha$ 2 was mixed or cotranslated with  $\Delta$ TR3, no new complexes were observed either. Negative results were also obtained when TR $\beta$  or RAR were used (data not shown). This indicates that although the dimerization and oligomerization functions of  $\Delta$ TR2 are highly exposed, this mutant protein only, or at least primarily, oligomerizes with itself but not with other receptors.

### TR $\alpha$ Binds to the TRE Mainly as a Monomer

TR $\alpha$  and the mutant proteins bind to the TRE in various patterns and complexes. To delineate the nature of these complexes, two additional oligonucleotides were designed and analyzed for their interaction with these receptor proteins. One sequence used was a TRE half-site (TRE/half); the other was an inverted perfect palindromic sequence, containing two TRE half-sites in the opposite orientation (TRE/op; Fig. 3A). Because of the palindromic nature of the TRE, TRs have been assumed to bind the TRE as a dimer. If the major complex (indicated in Fig. 3B) we observed here for TR $\alpha$  with the TRE however represents a TR $\alpha$  monomer, we expect a similar complex with the TRE/half and the TRE/op. As shown in Fig. 3B, TR $\alpha$  can efficiently bind to the TRE/half. It also binds to TRE/op forming one major complex. Thus the major TR $\alpha$  complex we ob-

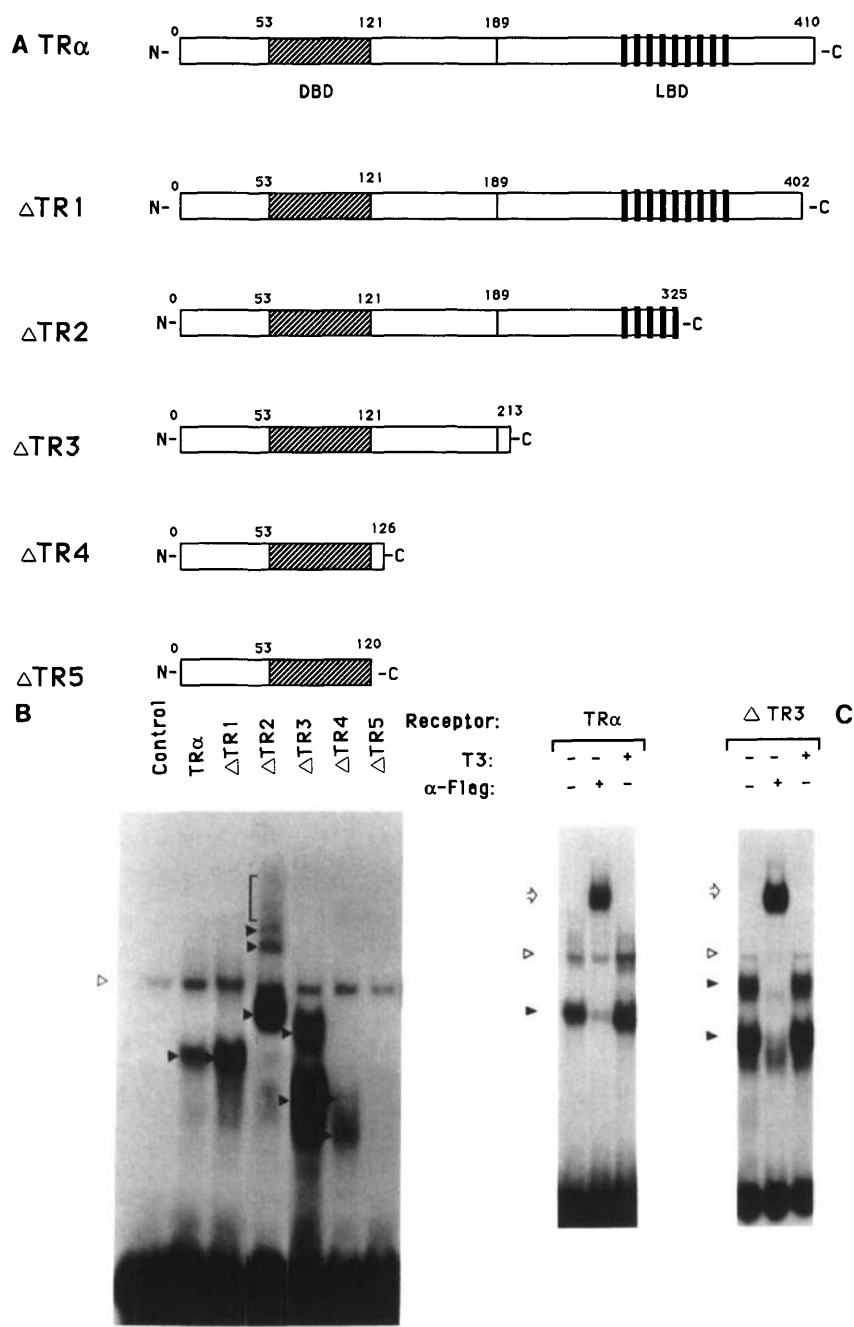

**Fig. 1.** DNA Binding Characteristics of TR $\alpha$  Deletion Mutants

A, Schematic representation of the TR $\alpha$  deletion mutants. Numbers above the bars indicate the amino acid positions. The DNA-binding domain (DBD) and the LBD are shown. A leucine zipper-like motif (41, 42) in the LBD containing 9-heptad repeats is indicated by the black bars. B, DNA binding of TR $\alpha$  deletion mutants. TR $\alpha$  deletion mutants were cloned into pBluescript, transcribed, and translated as described in *Materials and Methods*. Equal amounts of the *in vitro* synthesized TR $\alpha$  and mutant proteins were analyzed for their TRE binding activity by gel retardation assay. Control shows binding of unprogrammed reticulocyte lysate factor(s) to the TRE. Open triangles indicate the nonspecific TRE complex from unprogrammed reticulocyte lysate. Solid triangles indicate the specific complexes of TR $\alpha$  and the mutant proteins with TRE. Brackets indicate the minor high molecular weight TRE complexes of  $\Delta$ TR2. C, Specific binding of TR $\alpha$  and mutant receptor. Binding of the TR $\alpha$  and  $\Delta$ TR3 was analyzed by gel retardation assay in the presence or absence of  $10^{-7}$  M T<sub>3</sub>. To assure the specificity of binding of the *in vitro* synthesized proteins, a peptide (Flag)-encoding sequence was cloned 5' to the TR $\alpha$  and  $\Delta$ TR3 cDNAs as described in *Materials and Methods*. Anti-Flag antibody ( $\alpha$ -Flag) generated against the peptide was incubated with the receptor protein before the DNA binding reaction. The specific receptor-DNA complexes (indicated by the solid triangles) but not the nonspecific protein-DNA complexes (indicated by the open triangles) were upshifted by the anti-Flag antibody to form higher molecular weight complexes indicated by the open arrows.

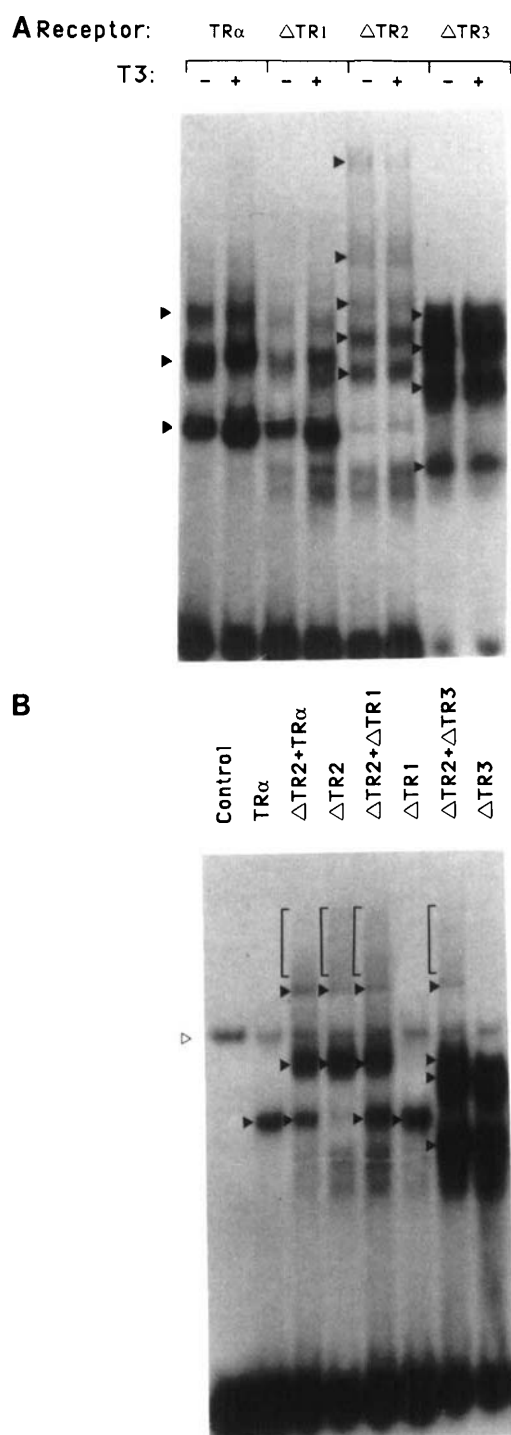

**Fig. 2.** DNA Binding Characteristics of  $\Delta$ TR2

A, DNA binding of TR $\alpha$  and the mutant protein to TRE dimer. Equal amounts of *in vitro* synthesized TR $\alpha$  and the mutant proteins were analyzed for binding to the TRE dimer using the gel retardation assay in the presence or in the absence of T<sub>3</sub> ( $10^{-7}$  M). Solid triangles indicate the specific receptor-DNA complexes. Several faster migrating complexes not marked by triangles might represent the binding of truncated protein products that result from the *in vitro* translation process. B,  $\Delta$ TR2 interaction with TR $\alpha$  or other deletion mutants, *in vitro* synthesized  $\Delta$ TR2 was incubated with equal amounts of *in vitro* synthesized TR $\alpha$ ,  $\Delta$ TR1, and  $\Delta$ TR3 and subjected to the gel retardation assay using <sup>32</sup>P-labeled TRE

serve with the palindromic TRE, the TRE/half and TRE/op, most likely represents monomer TR $\alpha$ -DNA complexes, consistent with recent data reported by Forman and Samuels (30). That TR $\alpha$  binds mainly as a monomer is also supported by our studies on the mutants with TRE/half and TRE/op. TR $\alpha$ 1 forms one prominent complex with the TRE, which also can be observed when TRE/half and TRE/op were used, indicating that this mutant also binds the TRE as a monomer. In contrast,  $\Delta$ TR2 forms several higher molecular weight complexes with the TRE that could not be observed when TRE/half was used. Comparing the positions of the fastest migrating  $\Delta$ TR2-TRE complexes with that of TR $\alpha$  and the TRE, we believe that the higher  $\Delta$ TR2-TRE complexes represent dimer/oligomer binding. Thus,  $\Delta$ TR2 binds to the TRE mainly as dimer and oligomer. Additional and strong support for the above conclusion comes from the study of  $\Delta$ TR3. This mutant forms two major complexes with the TRE. However when TRE/half was used, the higher molecular weight complex disappeared, while the binding of the low molecular weight complex was retained.  $\Delta$ TR3 can still form two complexes with TRE/op, although the higher molecular weight complex is slightly weaker than that observed with the TRE. Thus, the two complexes observed for  $\Delta$ TR3 represent binding of monomer and dimer mutant protein.

#### Interaction of TR $\alpha$ with a Nuclear Protein

It has been shown that nuclear protein extracts can enhance the DNA binding activity of several members of the nuclear receptor family (31–36). Recent data suggest that nuclear protein(s) also can enhance TR DNA binding activity (37, 38, for recent review see 39). However, in several of these studies the ABCD assay was used where biotinylated DNA probes (and their interacting proteins) are precipitated with antibody against the DNA probe (28). In this assay system, the nature of the interaction or the complexes formed cannot be resolved. To characterize how nuclear protein(s) affect TR $\alpha$  binding, cell extracts from CV-1, HeLat<sup>+</sup>, F9, and GC cells were prepared and analyzed for their effect on the TR $\alpha$ -DNA interaction (Fig. 4A). When cell extract from CV-1 cells was mixed with *in vitro* synthesized TR $\alpha$ , we observed a significant change of the TR $\alpha$  binding pattern. The typical TR $\alpha$ -TRE complex was reduced when extract was added. The disappearance of TR $\alpha$ -TRE complex was dependent on the amount of extract added, and was accompanied by the appearance of a new and higher molecular weight complex which became more prominent with increasing amounts of extract added. Thus, the cell extract appears to contain a factor which interacts with the TR $\alpha$ -

oligonucleotide. Control represents the binding of the unprogrammed reticulocyte lysate to TRE. The complex formed with unprogrammed lysate is indicated by the open triangle. Solid triangles indicate the specific receptor-DNA complexes. Brackets indicate the minor higher molecular weight complexes formed by  $\Delta$ TR2 with the TRE.

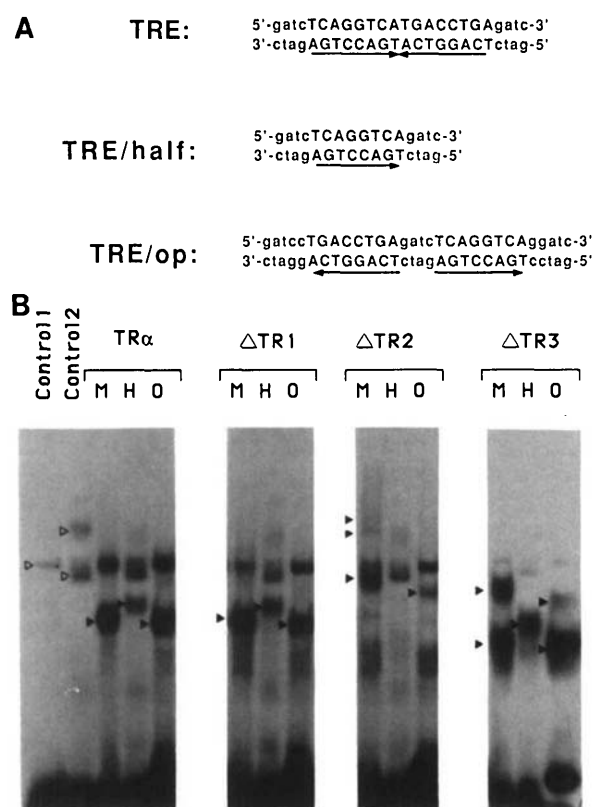

**Fig. 3.** TRα Binds the TRE Mainly as a Monomer

A, Sequences of three oligonucleotides were used for the gel retardation assay. TRE is the perfect palindromic T<sub>3</sub> response element. TRE/half is the half-site of the TRE. TRE/op is an oligonucleotide consisting of two TRE half-sites in the opposite orientation separated by 4 bp. B, DNA binding of TRα and TRα deletion mutants. *In vitro* synthesized TRα and TRα mutants were analyzed for their DNA binding characteristics to the palindromic TRE (M), TRE/half (H), and TRE/op (O) by gel retardation assay. Control 1 and control 2 represent the binding of unprogrammed reticulocyte lysate to TRE/op and TRE/half, respectively. Open triangles indicate the non-specific lysate complexes. Solid triangles indicate the specific receptor complexes. Binding data of ΔTR2 represent a shorter exposure to obtain a clear picture. (Note: We have consistently observed that the unprogrammed reticulocyte lysate forms two complexes with TRE/half, of which the slower migrating complex was diminished or inhibited when the reticulocyte lysate had been used for translation. This is also seen in Fig. 5A).

TRE complex to form a higher molecular weight complex. The effect of cell extract is specific to TRα since it was not found when the same amount of cell extract was added to the unprogrammed reticulocyte lysate. When cell extracts were prepared from F9 and GC cells, similar upshifts were observed (Fig. 4A). In addition, endogenous TRE binding activity was observed when high amounts of extracts from these cells were used. The endogeneous TRE binding activity from F9 and GC cells however migrated slower than the upshifted complex. When cell extract was prepared from HeLa<sup>+</sup>, no upshift was seen (Fig. 4B). Thus, the factor

which can interact with TRα is cell type specific or at least not present in all cell lines.

To confirm that the upshifted complexes resulted from the interaction between TRα and the nuclear factor, anti-Flag antibody was used. Incubation of this antibody with TRα and CV-1 cell extract resulted in upshifts of both the TRα-TRE complex and the nuclear factor complex. Because of the limited resolution of the polyacrylamide gel in the high molecular weight range, antibody upshifted TRα-TRE-nuclear factor complex migrated only slightly higher than the anti-Flag-TRα-TRE complex but was more smeared than the latter complex (Compare lane 3 and lane 5 or 7 of Fig. 4C, and lane 3 and lane 7 of Fig. 4D). Similar results were obtained when cell extract from F9 and GC cells were analyzed (Fig. 4, C and D). However, due to the strong endogenous TRE binding activity in GC cell extracts, the complexes observed in these studies were less clearly resolved. When HeLa<sup>+</sup> cell extract was used, we again could not clearly observe a new upshifted complex, and the antibody-upshifted complex in the presence of HeLa<sup>+</sup> cell extract was different from that in the presence of other cell extracts and was indistinguishable from the complex observed in the absence of HeLa<sup>+</sup> cell extract (Fig. 4D, compare lanes 3 and 5). These data therefore suggest that CV-1, F9, and GC cells contain a nuclear factor that can specifically interact with TRα to form a higher molecular weight complex. This factor is not present or is only present in trace amounts in HeLa<sup>+</sup> cells.

To investigate whether the interaction of TRα with the nuclear protein(s) was DNA sequence dependent, we analyzed the effect of CV-1 cell extract on TRα DNA interaction with different oligonucleotides. When cell extract was incubated with TRα and TRE/op, the TRα-TRE/op complex was upshifted to a position similar to that seen with the TRE but (Fig. 5A, arrow), in addition, a new and faster migrating complex was also observed. This new complex is specific since it was not found with CV-1 cell extract alone. Thus the TRE/op allows formation of different complexes between TRα and nuclear factor. When TRE/half was used, we found that CV-1 cell extract could also decrease the TRα-TRE/half complex as observed for the TRα-TRE complex; however, we could not detect an upshifted complex (Fig. 5A). Since the DNA sequence used contained only a TRα monomer binding site, we assume that the complex formed between TRα and the nuclear protein does not bind TRE/half efficiently. The data also suggest to us that the interaction between TRα and the nuclear factor identified here is not restricted to one TRE sequence and probably occurs in solution. Heating CV-1 cell extract for 10 min at 60 C before incubation with TRα and TRE abolished the interaction of this factor with TRα (Fig. 5B), suggesting that this factor is a protein or proteins.

**Absence of Nuclear Factor Correlates with Lack of TRα Activity in HeLa<sup>+</sup> Cells**

To examine whether the absence of nuclear factor in HeLa<sup>+</sup> cell extract correlated with altered TRα activity

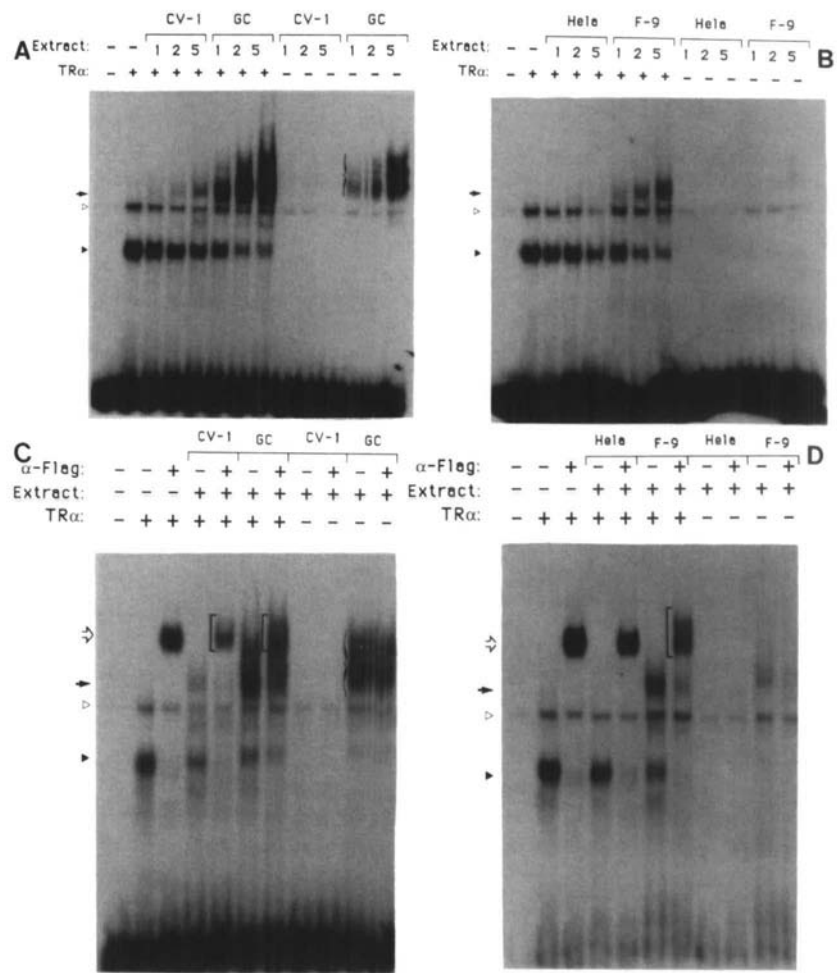

**Fig. 4.** Interaction of TR $\alpha$  with Nuclear Factor

A and B, Interaction of TR $\alpha$  with nuclear protein from CV-1, GC, HeLa<sup>-</sup>, and F-9 cells. Cell extracts were prepared from CV-1, GC, HeLa<sup>-</sup>, and F-9 cells as described in *Materials and Methods*. Indicated amounts of cell extract proteins (micrograms) were incubated with the *in vitro* synthesized TR $\alpha$  receptor protein (+) or equal amounts of unprogrammed reticulocyte lysate (–) at room temperature for 15 min before the DNA binding reaction. The mixtures were analyzed by gel retardation using <sup>32</sup>P-labeled TRE oligonucleotide. *Open triangles* indicate the binding of the unprogrammed reticulocyte lysate. *Solid triangles* indicate the specific TR $\alpha$ -TRE complexes, and the *arrows* indicate the complex formed between TR $\alpha$  and the nuclear protein. The *brace* (A) indicates binding of endogenous T<sub>3</sub> receptors from GC cell extract. C and D, Specificity of TR $\alpha$ -nuclear factor interaction. To demonstrate the specificity of the upshifted TR $\alpha$  complex by the nuclear protein, anti-Flag antibody ( $\alpha$ -Flag) was incubated with TR $\alpha$  or a premixture of TR $\alpha$  and the cell extract (5  $\mu$ g) from CV-1, GC, HeLa<sup>-</sup>, and F-9 cells. After incubation for 15 min, the mixtures were analyzed by gel retardation assay using <sup>32</sup>P-labeled TRE oligonucleotide. *Open triangles* indicate the nonspecific binding of the unprogrammed reticulocyte lysate. *Solid triangles* indicate the specific TR $\alpha$ -DNA complex. *Solid arrows* indicate the complex of TR $\alpha$  upshifted by the nuclear protein. *Open arrows* indicate the complex of TR $\alpha$  upshifted by the anti-Flag antibody. *Brackets* indicate the TR $\alpha$ -nuclear protein complex upshifted by the anti-Flag antibody. The *brace* (C) indicates the binding of the endogenous T<sub>3</sub> receptors from GC cell extracts.

in these cells, we compared the transcriptional activation activity of transiently expressed TR $\alpha$  with that of other nuclear receptors in HeLa<sup>-</sup> cells. When a TR $\alpha$  expression vector was cotransfected with a TRE<sub>2</sub>-tk-chloramphenicol aminotransferase (CAT) reporter, no reporter activity could be observed in the presence or absence of T<sub>3</sub> in HeLa<sup>-</sup> cells (Fig. 6). The inactivity of TR $\alpha$  in the HeLa<sup>-</sup> cells is not due to the reporter used, since it functions well in CV-1 cells, and in addition, ERE-tk-CAT, in which the ERE was cloned into the same position of the reporter vector as the TRE, functions well in HeLa<sup>-</sup> cells. Similar positive results

were obtained with a GR expression vector/reporter plasmid cotransfection (data not shown). Thus, the inactivity of TR $\alpha$  in HeLa<sup>-</sup> cells is most likely due to the absence of a factor(s) which is required for TR $\alpha$  function, although the presence of a factor(s) which represses TR $\alpha$  activity also cannot be excluded.

#### Leucine Zipper-Like Domain Participates in the Interaction with Nuclear Protein

To delineate which domain of TR $\alpha$  is responsible for the interaction with the nuclear factor identified here,

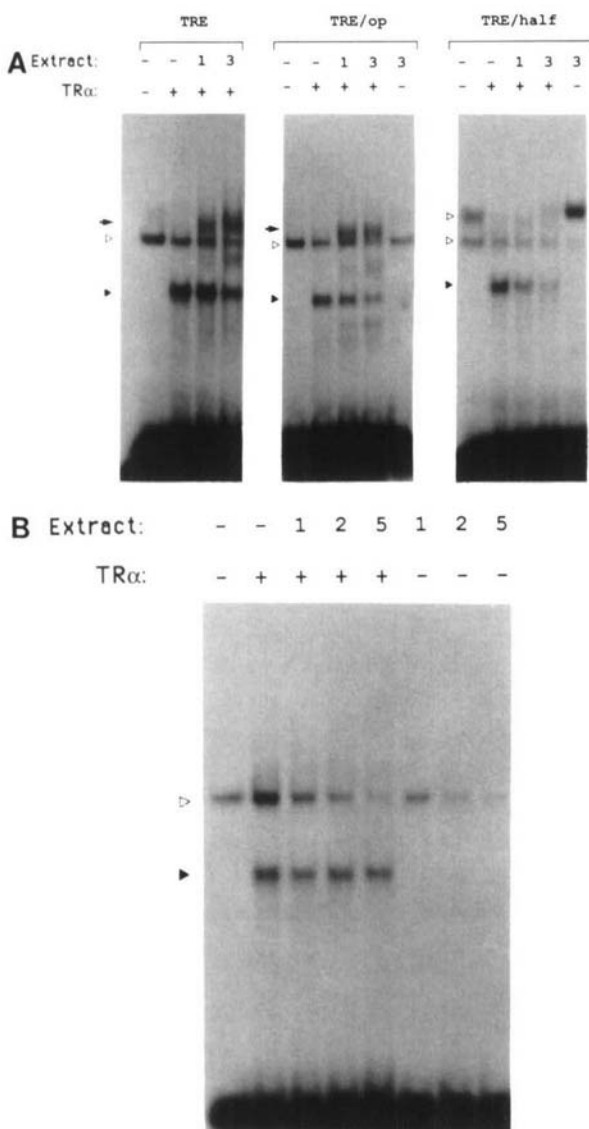

**Fig. 5.** Characteristics of the Nuclear Factor-TR $\alpha$  Interactions  
A, Interaction of the nuclear factor and TR $\alpha$  is DNA independent. Indicated amounts of protein extract (micrograms) from CV-1 cells were incubated with *in vitro* synthesized TR $\alpha$  (+) or the equal amount of the unprogrammed reticulocyte lysate (–) at room temperature for 15 min. The mixtures were then analyzed by gel retardation using  $^{32}$ P-labeled TRE, TRE/op, and TRE/half oligonucleotides. *Open triangles* indicate nonspecific binding of the unprogrammed reticulocyte lysate. *Solid triangles* indicate the specific binding of TR $\alpha$ . *Arrows* indicate the complex of TR $\alpha$  upshifted by the nuclear protein.  
B, The nuclear factor is heat sensitive. The indicated amounts of the protein extract (micrograms) from CV-1 cells were heated at 60 C for 10 min before incubation with *in vitro* synthesized TR $\alpha$  protein (+) or the equal amount of unprogrammed reticulocyte lysate (–). The mixtures were then analyzed by gel retardation assay using  $^{32}$ P-labeled TRE oligonucleotide.

the TR $\alpha$  deletion mutants were analyzed for their ability to interact with protein from CV-1 cell extract. CV-1 cell extract was able to upshift the complexes formed by TR $\alpha$  and  $\Delta$ TR1 with TRE to a similar position (Fig. 7),

indicating that the C-terminal eight amino acids of the TR $\alpha$  C-terminus are not essential for the interaction. When  $\Delta$ TR2 was analyzed we were unable to distinguish an upshifted complex in the presence of CV-1 cell extract, but we observed repeatedly inhibition of formation of the high molecular weight complexes seen with  $\Delta$ TR2 alone (Fig. 7). This result suggests that the nuclear protein may still interact with  $\Delta$ TR2 and interferes with the formation of the higher  $\Delta$ TR2 oligomers. Thus  $\Delta$ TR2 appears to retain the ability to interact with the nuclear factor. When  $\Delta$ TR3 (deleted for most of the ligand binding domain) was analyzed, we found that addition of CV-1 cell extract neither decreased  $\Delta$ TR3 binding to the TRE nor resulted in the appearance of a new complex. The CV-1 cell extract similarly did not affect DNA binding of  $\Delta$ TR4 either. Thus, a domain responsible for the interaction with the nuclear protein is located between amino acid 213 and amino acid 325, a region that contains a leucine zipper-type motif (Fig. 1A), previously suggested to mediate receptor dimerization (40, 41).

**Transcriptional Activation Activities of the TR $\alpha$  Mutants**

To assess the transcriptional activation activities of the mutant receptors, expression vectors of the mutant proteins were cotransfected together with a TRE-tk-CAT reporter into CV-1 cells (Fig. 8). While cotransfection of wild type TR $\alpha$  with TRE-tk CAT resulted in a ligand-dependent reporter activity, mutant receptors showed little T $_3$ -dependent activity. However,  $\Delta$ TR $\alpha$ 2,  $\Delta$ TR $\alpha$ 3, and  $\Delta$ TR $\alpha$ 4 exhibited a significant constitutive activity. The constitutive activity increased when higher amounts of mutant receptor expression vectors were used. The constitutive activity appears to require DNA binding, since  $\Delta$ TR $\alpha$ 5, a mutant that lacks DNA binding activity, did not exhibit the constitutive activity. Thus, deletion of the TR $\alpha$  C-terminal sequences impairs receptor ligand-induced transcriptional activity but exposes a constitutive activation activity, observed so far mostly for GR (42, 43).

It has been shown that v-erbA inhibits TR $\alpha$  activity due to its strong DNA binding. To investigate whether the receptor mutants that elicited strong DNA binding can also repress wild type receptor activity, TR $\alpha$  was cotransfected with the mutant receptors into CV-1 cells. Surprisingly, none of the mutant proteins showed a significant repressor activity (data not shown). Thus although the TR $\alpha$  mutants bind the TRE, they are inefficient inhibitors of TR $\alpha$ .

**DISCUSSION**

The ligand-binding carboxy-terminal domain of nuclear receptors encompasses multiple functions. It determines the ligand specificity and mediates receptor dimerization and transactivation functions of the receptor.





subunits or the independent binding of receptor subunits. However, the  $\Delta$ TR3 mutant no longer contains the leucine zipper-like sequences, and we therefore expect that this mutant dimerizes through another region. This dimerization function is likely to be contained in the DNA-binding domain since two complexes were also observed with  $\Delta$ TR4. In addition, three-dimensional structure analyses on the GR and ER DNA-binding domains have demonstrated a dimerization function for this domain in both receptors (44, 45). Thus, while  $\Delta$ TR4 contains only the dimerization function of the DNA binding region,  $\Delta$ TR2 contains in addition the leucine zipper-type dimerization/oligomerization function and therefore formed oligomers efficiently. The carboxy-terminal region that interferes with TR $\alpha$  dimerization also represses a ligand-independent transcriptional activation function of TR $\alpha$ . Such ligand-independent transcriptional activation activities have been reported for other steroid hormone receptors (42, 43, 46) and in one case have been subscribed to the DNA-binding domain alone (47).

We have demonstrated that protein from some cell lines, including CV-1, F9, and GC cells, interacts with TR $\alpha$  on the palindromic TRE. The TR $\alpha$ -TRE complex is upshifted by protein from these cells to form a slower migrating complex. The complex formed in the presence of the nuclear extracts is TR $\alpha$  dependent, as this new complex does not appear when the nuclear factor is incubated with the unprogrammed reticulocyte lysate. Moreover, the complex can be further shifted by an anti-TR $\alpha$ -specific antibody. Experiments with cell extracts from different cell lines indicate that the nuclear protein is present in CV-1, F9, and GC cells, and it is not present in HeLa $\text{tk}^-$  cells. The nature of this factor is not known, although its heat sensitivity suggests that it is a protein. The nuclear factor upshifted the TR $\alpha$ -TRE complex to a position higher than the TR $\alpha$  dimer. These results suggest that the mol wt of the factor we identified here is about 55K. Based on its molecular weight and the suggested interaction between nuclear receptors (26, 39, 40, 48), the possibility that this factor may be a member of steroid thyroid receptor family is under investigation.

The function of this TR $\alpha$ -associating factor is not yet clear. Besides its ability to stabilize the TR $\alpha$ -TRE interaction, it could directly mediate the transcriptional activity of TR $\alpha$  by serving as a link between TR $\alpha$  and the transcriptional machinery. This hypothesis is supported by our observation that TR $\alpha$  does not activate the palindromic TRE in HeLa $\text{tk}^-$  cells, which also lack any measurable activity of this protein. Interestingly, the related ER and GR show high activity in HeLa $\text{tk}^-$  cells, supporting our hypothesis that this protein is TR specific. It will be interesting to investigate whether this protein interacts with RARs, which are members of TR/RAR subfamily. The ER binds to a single palindromic ERE very efficiently *in vitro* and forms several complexes (22). Importantly, TR $\alpha$ -ER hybrid receptors that contain the ER LBD also bind efficiently to the TRE (19, 22). These data therefore suggest to us that the TR $\alpha$

LBD may inhibit TR $\alpha$  DNA binding, dimerization/oligomerization, and transcriptional activation activity on the TRE. Interaction with the nuclear factor would counteract the inhibitory function of the LBD and allow efficient DNA binding, dimerization, and transcriptional activation in the presence of T $_3$ . In contrast, ER appears to bind a perfect palindromic ERE and dimerize efficiently in the absence of a nuclear factor (22).

Deletion analysis suggested that amino acids 213–325 are critical for TR $\alpha$  interaction with the nuclear factor, since the absence of this region abolished it, as observed by Lazar and Berrodin (35). Amino acids 213–325 encompass a stretch of hydrophobic amino acids that could represent such a domain. This domain consists of several heptad repeats of hydrophobic amino acids (40, 41) and enables receptor dimerization/oligomerization as revealed by our deletion analysis. Our data indicate that, in addition, interaction of TR $\alpha$  with the nuclear factor may be mediated through these hydrophobic sequences. The interaction of TR $\alpha$  with the nuclear factor also could be detected when the TRE/op was used, indicating that the complex containing TR $\alpha$  and the nuclear protein is able to bind to several DNA sequences. However, when TRE/half was used, we only observed the disappearance of the TR $\alpha$ -TRE complex, and the TR $\alpha$ -nuclear protein-DNA complex was not detected. This suggests that TR $\alpha$ -nuclear factor complex does not interact significantly with TRE/half and, importantly, that TR $\alpha$  and the nuclear factor can interact in solution. Thus, the nuclear protein does not bind the TRE alone effectively, but mediates high affinity binding when it is complexed with TR $\alpha$ . This could occur through the direct formation of a TR $\alpha$ -nuclear protein heterodimer. Our finding that several deletion mutants showed strong DNA binding *in vitro* but little repressor activity may be due in part to the constitutive activity of these mutants but also may suggest that complexing of the receptor with the nuclear protein is required for optimal repressor activity of TR $\alpha$  (10, 19).

Taken together, we have shown here that TR $\alpha$  may contain two dimerization domains, one most likely located in the DNA-binding domain, while the other is part of the LBD. This second dimerization/oligomerization domain—probably the previously described leucine zipper-type motif—is also important for interaction with a nuclear factor which in fact may be its major function. While the analysis of the characteristics of this protein awaits molecular cloning of its gene, it appears to have a fundamental role in controlling TR $\alpha$  function. Finally, the very carboxy-terminal region of TR $\alpha$  appears to inhibit TR $\alpha$  dimerization activities as well as DNA binding. This region is replaced through an extended carboxy-terminal region in TR $\alpha$ 2, a protein that reveals very little DNA-binding activity (26). It will be of interest to investigate whether the carboxy-terminal regions of TR $\alpha$  isoforms and related receptors directly interact with the DNA-binding domain and the leucine zipper region of the receptor and thereby inhibit their activities.

## MATERIALS AND METHODS

### Construction of Expression and Reporter Plasmids

The coding sequence of TR $\alpha$  was inserted into the multiple cloning sites of the eukaryotic vector pECE (49) or pBluescript (Stratagene, La Jolla, CA). The construction of these plasmids has been described previously (9). To obtain TR $\alpha$  deletion mutants, existing restriction enzyme sites on TR $\alpha$  were used to digest TR $\alpha$  cDNA. The resulting TR $\alpha$  cDNA fragments were purified and cloned into pECE and pBluescript.  $\Delta$ TR1,  $\Delta$ TR2,  $\Delta$ TR3,  $\Delta$ TR4, and  $\Delta$ TR5 were generated by digesting TR $\alpha$  cDNA with *Xho*I (1530), *Hinc*II (1310), *Stu*I (964), *Xba*I (698), and *Bal*I (685), respectively. Numbers within the brackets indicate the DNA sequence positions of the restriction enzyme sites (4).

The construction of reporter plasmids, TRE-tk-CAT, TRE<sub>2</sub>-tk-CAT, and ERE-tk-CAT also has been described previously (19). Briefly, one copy or two copies of the synthetic palindromic TRE sequence (TCAGGTCATGACCTGA) or one copy of the synthetic ERE oligonucleotide (TCAGGTCACTGTGACCTGA) was inserted into the *Bam*HI site of pBL-CAT<sub>2</sub> (50) by using *Bgl*II linkers to generate TRE-tk-CAT, TRE<sub>2</sub>-tk-CAT, or ERE-tk-CAT, respectively. The construction of Flag-TR $\alpha$  has been described (26).

### Tissue Culture, Transient Transfection, and CAT Assay

CV-1 cells were grown in Dulbecco's modified Eagle's (DME) medium supplemented with 10% fetal calf serum (FCS). HeLa<sup>-</sup> cells were maintained in DME medium with 10% calf serum (CS). CV-1 cells were plated at  $1.5 \times 10^5$ – $2.0 \times 10^6$  per dish 16–24 h before transfection. A modified calcium phosphate precipitation procedure was used for transient transfection (51) and is described elsewhere (52). In general, 2  $\mu$ g reporter plasmid, 3  $\mu$ g  $\beta$ -galactosidase ( $\beta$ -gal) expression vector (pCH 110, Pharmacia, Piscataway, NY), and variable amounts of receptor expression vector were mixed with carrier DNA (Bluescript) to 20  $\mu$ g total DNA per plate.  $\beta$ -Gal was determined as described (52) with a modification to allow the assay to be run in microtiter plates (53). CAT activity was determined by using [<sup>3</sup>H]acetyl coenzyme A as substrate (54). To normalize for transfection efficiency, we corrected the CAT activities for  $\beta$ -gal activity. For CAT assays, cells were also seeded in 24-well dishes, using approximately 1/20 of the cells and 1/20 of the DNA mixtures that were used for transfection in large dishes (53).

### Preparation of Receptor Proteins

cDNAs for TR $\alpha$  and the deletion mutants cloned into pBluescript (Stratagene) were transcribed by using T7 or T3 RNA polymerases, and the transcripts were translated in the rabbit reticulocyte lysate system (Promega, Madison, WI) as described (19, 52). The relative amount of the translated proteins was determined by separating the [<sup>35</sup>S]methionine-labeled proteins on sodium dodecyl sulfate-polyacrylamide gels, quantitating the amount of incorporated radioactivity and normalizing it relative to the content of methionine residues in each protein.

### Preparation of Specific DNA Fragments

The TRE used in the experiments was a 16-base pair (bp) perfect palindromic TRE (TCAGGTCATGACCTGA) (28). An oligonucleotide flanked by a *Bgl*II adaptor sequence was synthesized (Applied Biosystems DNA Synthesizer, Foster City, CA) and purified by polyacrylamide gel electrophoresis. Oligonucleotides were annealed and were radioactively labeled using the Klenow fragment of DNA polymerase. To obtain TRE dimer, the synthetic TRE monomer was ligated, and double-stranded dimer TRE was purified by polyacrylamide

gel electrophoresis. In these dimers, the two TREs are separated by 4 bp of the *Bgl*II restriction site. TRE/op is an oligonucleotide consisting of two TRE half-sites with a 4-bp spacer (GATCCTGACCTGAGATCTCAGGTCAG). TRE/half is an oligonucleotide consisting of one TRE half-site (GATCTCAGGTCAG). Both oligonucleotides are synthesized with a *Bgl*II adaptor sequence. Labeled TRE probes were purified by gel electrophoresis and used for the gel retardation assay.

### Preparation of Cell Extracts

F-9 cells were maintained in  $\alpha$ -Medium supplemented with 10% FCS, and GC cells were grown in DME medium supplemented with 5% horse serum and 2.5% FCS. Cell extracts were prepared from HeLa<sup>-</sup>, CV-1, F-9, and GC cells in a buffer containing 20 mM HEPES, pH 7.9, 0.4 M KCl, 2 mM dithiothreitol, and 20% glycerol as described (9).

### Gel Retardation Assay

*In vitro* translated receptor protein (1–5  $\mu$ l) was incubated with the <sup>32</sup>P-labeled oligonucleotides in a 20- $\mu$ l reaction mixture containing 10 mM HEPES buffer, pH 7.9, 50 mM KCl, 1 mM dithiothreitol, 2.5 mM MgCl<sub>2</sub>, 10% glycerol, and 1  $\mu$ g poly(dI-dC) at 25 C for 20 min. The reaction mixture was then loaded on a 5% nondenaturing polyacrylamide gel containing 0.5  $\times$  TBE (1  $\times$  TBE = 0.089 M Tris-borate, 0.089 M boric acid, and 0.002 M EDTA). To analyze the effect of the nuclear proteins on receptor DNA binding activity, the cell extracts were preincubated with receptor protein at room temperature for 15 min before performing the DNA binding assay. When anti-Flag antibody was used, 0.5  $\mu$ l of the antiserum was incubated with the receptor protein or the preincubated receptor-nuclear protein mixture at room temperature for 30 min before performing the DNA binding assay described above.

### Acknowledgments

Received August 9, 1991. Revision Received October 3, 1991. Accepted October 8, 1991.

Address requests for reprints to: Dr. Magnus Pfahl, La Jolla Cancer Research Foundation, 10901 N. Torrey Pines Road, La Jolla, California 92037.

This work was supported by NIH Grant DK35083.

\* Supported by a postdoctoral fellowship from the Tobacco-Related Disease Research Program of the University of California.

## REFERENCES

1. Sap J, Muñoz A, Damm K, Goldberg Y, Ghysdael J, Leutz A, Beug H, Vennström B 1986 The c-erb-A protein is a high-affinity receptor for thyroid hormone. *Nature* 324:635–640
2. Weinberger C, Thompson CC, Ong ES, Lebo R, Gruol DJ, Evans RM 1986 The c-erb-A gene encodes a thyroid hormone receptor. *Nature* 324:641–646
3. Benbrook D, Pfahl M 1987 A novel thyroid hormone receptor encoded by a cDNA clone from a human testis library. *Science* 238:788–791
4. Thompson CC, Weinberger C, Lebo R, Evans RM 1987 Identification of a novel thyroid hormone receptor expressed in the mammalian central nervous system. *Science* 237:1610–1613
5. Evans RM 1988 The steroid and thyroid hormone receptor family. *Science* 240:889–895
6. Green S, Chambon P 1988 Nuclear receptors enhance

- our understanding of transcription regulation. *Trends Genet* 4:309–314
7. Beato M 1989 Gene regulation by steroid hormones. *Cell* 56:335–344
  8. Umesono K, Giguere V, Glass CK, Rosenfeld MG, Evans RM 1988 Retinoic acid and thyroid hormone induce gene expression through a common responsive element. *Nature* 336:262–265
  9. Graupner G, Wills KN, Tzukerman M, Zhang X-K, Pfahl M 1989 Dual regulatory role for thyroid-hormone receptors allows control of retinoic-acid receptor activity. *Nature* 340:653–656
  10. Graupner G, Zhang X-K, Tzukerman M, Wills K, Hermann T, Pfahl M 1991 Thyroid hormone receptors repress estrogen receptor activation of a TRE. *Mol Endocrinol* 5:365–372
  11. Jansson M, Philipson L, Vennström B 1983 Isolation and characterization of multiple human genes homologous to the oncogenes of avian erythroblastosis virus. *EMBO J* 2:561–565
  12. Nakai A, Sakurai A, Bell GI, DeGroot LJ 1988 Characterization of a third human thyroid hormone receptor coexpressed with other thyroid hormone receptors in several tissues. *Mol Endocrinol* 2:1087–1092
  13. Mitsuhashi T, Tennyson GE, Nikodem VM 1988 Alternative splicing generates messages encoding rat c-erbA proteins that do not bind thyroid hormone. *Proc Natl Acad Sci USA* 85:5804–5808
  14. Lazar MA, Hodin RA, Chin WW 1989 Human carboxyl-terminal variant of  $\alpha$ -type c-erbA inhibits trans-activation by thyroid hormone receptors without binding thyroid hormone. *Proc Natl Acad Sci USA* 86:7771–7774
  15. Koenig RJ, Lazar MA, Hodin RA, Brent GA, Larsen PR, Chin WW, Moore DD 1989 Inhibition of thyroid hormone action by a non-hormone binding c-erbA protein generated by alternative mRNA splicing. *Nature* 337:659–660
  16. Sakurai A, Nakai A, DeGroot LJ 1989 Expression of three forms of thyroid hormone receptor in human tissues. *Mol Endocrinol* 3:392–399
  17. Hodin RA, Lazar MA, Wintman BI, Darling DS, Koenig RJ, Larsen PR, Moore D, Chin WW 1989 Identification of a thyroid hormone receptor that is pituitary-specific. *Science* 244:76–78
  18. Damm K, Thompson CC, Evans RM 1989 Protein encoded by v-erbA functions as a thyroid-hormone receptor antagonist. *Nature* 339:593–597
  19. Zhang X-K, Wills KN, Hermann T, Graupner G, Tzukerman M, Hermann T, Pfahl M 1991 Ligand-binding domain of thyroid hormone receptors modulates DNA binding and determines their bifunctional roles. *New Biol* 3:1–14
  20. Brent GA, Dunn MK, Harney JW, Gulick T, Larsen PR, Moore DD 1989 Thyroid hormone aporeceptor represses T<sub>3</sub>-inducible promoters and blocks activity of the retinoic acid receptor. *New Biol* 1:329–336
  21. Baniahmad A, Steiner C, Kohne AC, Renkawitz R 1990 Modular structure of a chicken lysozyme silencer: involvement of an unusual thyroid hormone receptor binding site. *Cell* 61:505–514
  22. Tzukerman M, Zhang X-K, Hermann T, Wills KN, Graupner G, Pfahl M 1990 The human estrogen receptor has transcriptional activator and repressor functions in the absence of ligand. *New Biol* 2:613–620
  23. Sap J, Muñoz A, Schmitt J, Stunnenberg H, Vennström B 1989 Repression of transcription mediated at a thyroid hormone response element by the v-erbA oncogene product. *Nature* 340:242–243
  24. Zenke M, Muñoz A, Sap J, Vennström B, Beug H 1990 v-erbA oncogene activation entails the loss of hormone-dependent regulatory activity of c-erbA. *Cell* 61:1035–1049
  25. Schueler PA, Schwartz HL, Strait KA, Mariash CN, Oppenheimer JH 1990 Binding of 3,5,3'-triiodothyronine (T<sub>3</sub>) and its analogs to the *in vitro* translation products of c-erbA protooncogenes: differences in the affinity of the  $\alpha$ - and  $\beta$ -forms for the acetic acid analog and failure of the human testis and kidney  $\alpha$ -2 products to bind T<sub>3</sub>. *Mol Endocrinol* 4:227–234
  26. Hermann T, Zhang X-k, Tzukerman M, Wills KN, Graupner G, Pfahl M 1991 Regulatory functions of a non-ligand binding thyroid hormone receptor isoform. *Cell Regul* 2:565–574
  27. Sakurai A, Takeda K, Ain K, Ceccarelli P, Nakai A, Seino S, Bell GI, Refetoff S, DeGroot LJ 1989 Generalized resistance to thyroid hormone associated with a mutation in the ligand-binding domain of the human thyroid hormone receptor  $\beta$ . *Proc Natl Acad Sci USA* 86:8977–8981
  28. Glass CK, Holloway JM, Devary OV, Rosenfeld MG 1988 The thyroid hormone receptor binds with opposite transcriptional effects to a common sequence motif in thyroid hormone and estrogen response elements. *Cell* 54:313–323
  29. Hopp TP, Prickett KS, Price VL, Libby RT, March CJ, Cerretti DP, Urdal DL, Conlon PJ 1988 A short polypeptide marker sequence useful for recombinant protein identification and purification. *BioTechnology* 6:1204–1210
  30. Forman BM, Samuels HH, pEXRESS: a family of novel expression vectors containing a single transcription unit that is active *in vitro*, in prokaryotes and in eukaryotes. *Gene*, in press
  31. Cavanaugh AH, Simons SS 1990 Glucocorticoid receptor binding to calf thymus DNA. 1. Identification and characterization of a macromolecular factor involved in receptor-steroid complex binding to DNA. *Biochemistry* 29:989–996
  32. Edwards DP, Kuhnel B, Estes PA, Nordeen SK 1989 Human progesterone receptor binding to mouse mammary tumor virus deoxyribonucleic acid: Dependence on hormone and nonreceptor nuclear factor(s). *Mol Endocrinol* 3:381–391
  33. Feavers IM, Jiricny J, Monchamont B, Saluz HP, Jost JP 1987 Interaction of two nonhistone proteins with the estradiol response element of the avian vitellogenin gene modulates the binding of estradiol-receptor complex. *Proc Natl Acad Sci USA* 84:7453–7457
  34. Liao J, Ozono K, Sone T, Pike JW 1990 Vitamin D receptor interaction with specific DNA requires a nuclear protein and 1,25-dihydroxyvitamin D<sub>3</sub>. *Proc Natl Acad Sci USA* 87:9751–9755
  35. Lazar MA, Berrodin TJ 1990 Thyroid hormone receptors form distinct nuclear protein-dependent and independent complexes with a thyroid hormone response element. *Mol Endocrinol* 4:1627–1635
  36. Glass CK, Devary OV, Rosenfeld MG 1990 Multiple cell type-specific proteins differentially regulate target sequence recognition by the  $\alpha$  retinoic acid receptor. *Cell* 63:729–738
  37. Murray MB, Towle HC 1989 Identification of nuclear factors that enhance binding of the thyroid hormone receptor to a thyroid hormone response element. *Mol Endocrinol* 3:1434–1442
  38. Burnside J, Darling DS, Chin WW 1990 A nuclear factor that enhances binding of thyroid hormone receptors to thyroid hormone response elements. *J Biol Chem* 265:2500–2504
  39. Rosen ED, O'Donnell AL, Koenig RJ 1991 Protein-protein interactions involving erbA superfamily receptors: through the TRAPdoor. *Mol Cell Endocrinol* 78:C83–C88
  40. Forman BM, Yang C-r, Au M, Casanova J, Ghysdael J, Samuels HH 1989 A domain containing leucine-zipper-like motifs between the thyroid hormone and retinoic acid receptors. *Mol Endocrinol* 3:1610–1626
  41. Forman BM, Samuels HH 1990 Interactions among a subfamily of nuclear hormone receptors: the regulatory zipper model. *Mol Endocrinol* 4:1293–1301
  42. Miesfeld R, Godowski PJ, Maler BA, Yamamoto KR 1987 Glucocorticoid receptor mutants that define a small region sufficient for enhancer activation. *Science* 236:423–427
  43. Hollenberg SM, Evans RM 1988 Multiple and cooperative

- trans-activation domains of the human glucocorticoid receptor. *Cell* 55:899–906
44. Hård T, Kellenbach E, Boelens R, Maler BA, Dahiman K, Freeman LP, Carlstedt-Duke J, Yamamoto KR, Gustafsson J-Å, Kaptein R 1990 Solution structure of the glucocorticoid receptor DNA-binding domain. *Science* 249:157–160
  45. Schwabe JWR, Neuhaus D, Rhodes D 1990 Solution structure of the DNA-binding domain of the estrogen receptor. *Nature* 348:458–461
  46. Tora L, White J, Brou C, Tasset D, Webster N, Scheer E, Chambon P 1989 The human estrogen receptor has two independent nonacidic transcriptional activation functions. *Cell* 59:477–487
  47. Godowski PJ, Rusconi S, Miesfeld R, Yamamoto KR 1987 Glucocorticoid receptor mutants that are constitutive activators of transcriptional enhancement. *Nature* 325:365–368
  48. O'Donnell AL, Rosen ED, Darling DS, Koenig RJ 1991 Thyroid hormone receptor mutations that interfere with transcriptional activation also interfere with receptor interaction with a nuclear protein. *Mol Endocrinol* 5:94–99
  49. Ellis L, Clauser E, Morgan DO, Edery M, Roth RA, Rutter WJ 1986 Replacement of insulin receptor tyrosine residues 1162 and 1163 compromises insulin-stimulated kinase activity, uptake of 2-deoxyglucose. *Cell* 45:721–732
  50. Luckow B, Schutz G 1987 CAT constructions with multiple unique restriction sites for the functional analysis of eukaryotic promoters, regulatory elements. *Nucleic Acids Res* 15:5490
  51. Chen CA, Okayama H 1988 Calcium phosphate-mediated gene transfer: a highly efficient transfection system for stably transforming cells with plasmid DNA. *Bio-Techniques* 6:632–637
  52. Pfahl M, Tzukerman M, Zhang X-K, Lehmann JM, Hermann T, Wills KN, Graupner G 1990 Rapid procedures for nuclear retinoic acid receptor cloning and their analysis. *Methods Enzymol* 18:256–270
  53. Husmann M, Lehmann J, Hoffman B, Hermann T, Tzukerman M, Pfahl M 1991 Antagonism between retinoic acid receptors. *Mol Cell Biol* 11:4097–4103
  54. Nielsen DA, Chang T-C, Shapiro DJ 1989 A highly sensitive, mixed-phase assay for chloramphenicol acetyltransferase activity in transfected cells. *Anal Biochem* 179:19–23

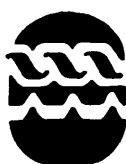

Source: http://academic.oup.com/mend/article-pdf/5/12/1909/10490411/mend1909.pdf
